# Supplementary material for: Synthesis and characterization of α,ω-end orthogonally functionalizable glycopolymers from native glycans
Source: Royal Society of Chemistry journal article supplement (doi:10.1039/d4py00191e), 2024-01-01
Supplement: d4py00191e1.pdf [file d4py00191e1.pdf]

# Synthesis and Characterization of $\alpha,\omega$ -End Orthogonally Functionalizable Glycopolymers from Native Glycans

Joseph M. Keil<sup>a</sup>, Ka Keung Chan<sup>a</sup>, Xue-Long Sun\*

## Supporting Information

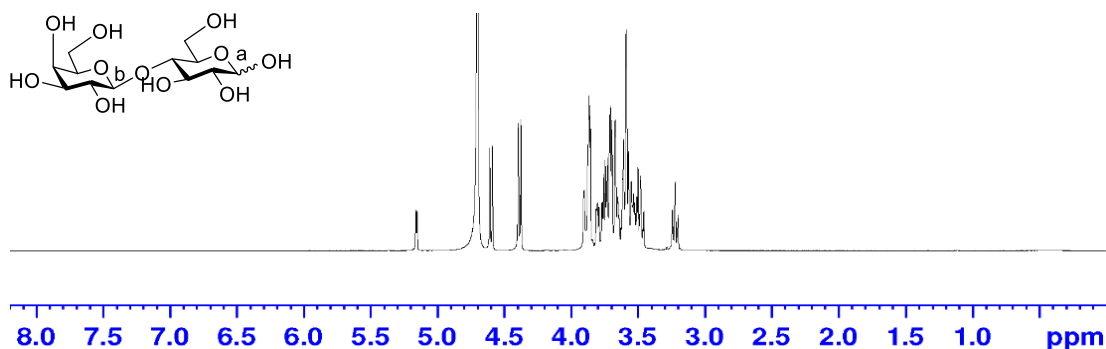

**Fig. S1.** <sup>1</sup>H NMR spectrum of lactose (400 MHz, D<sub>2</sub>O).

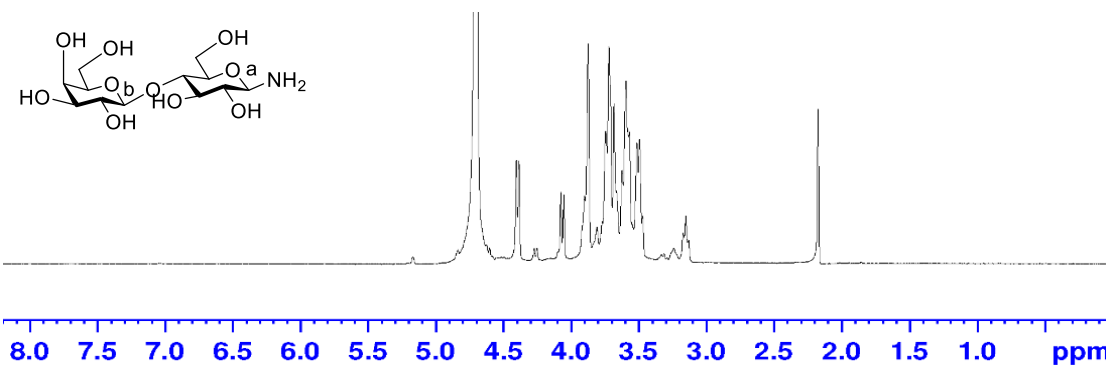

**Fig. S2.** <sup>1</sup>H NMR spectrum of lactosylamine (400 MHz, D<sub>2</sub>O).

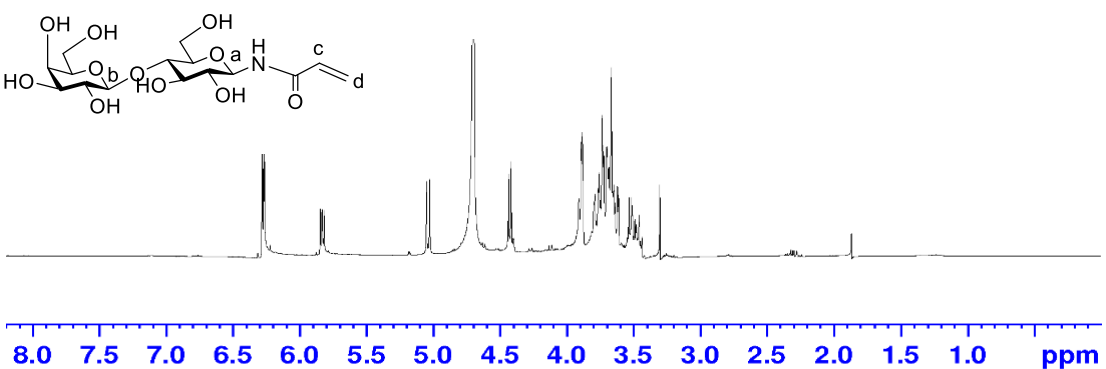

**Fig. S3.** <sup>1</sup>H NMR spectrum of *N*-prop-2-enoyl- $\beta$ -D-lactopyranosyl acrylamide (400 MHz, D<sub>2</sub>O).

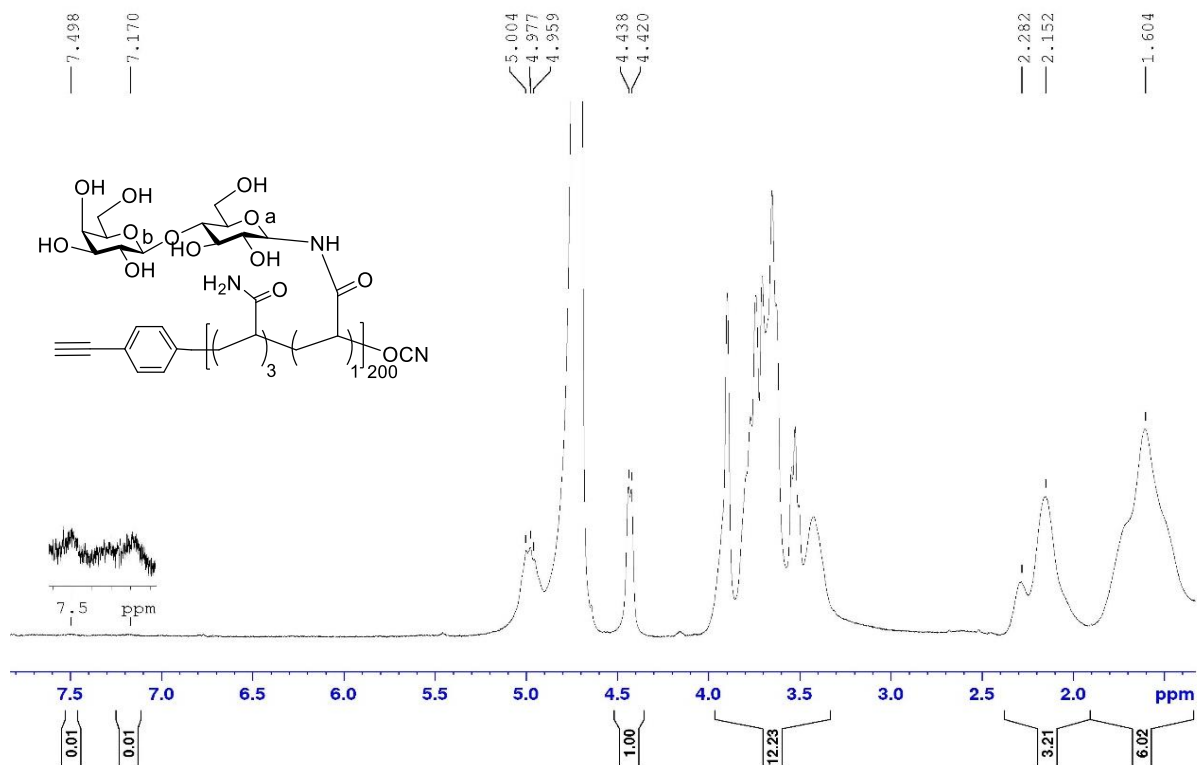

**Fig. S4.** <sup>1</sup>H NMR spectrum of alkyne chain-end functionalized *N*-lactose polymer (400 MHz, D<sub>2</sub>O).

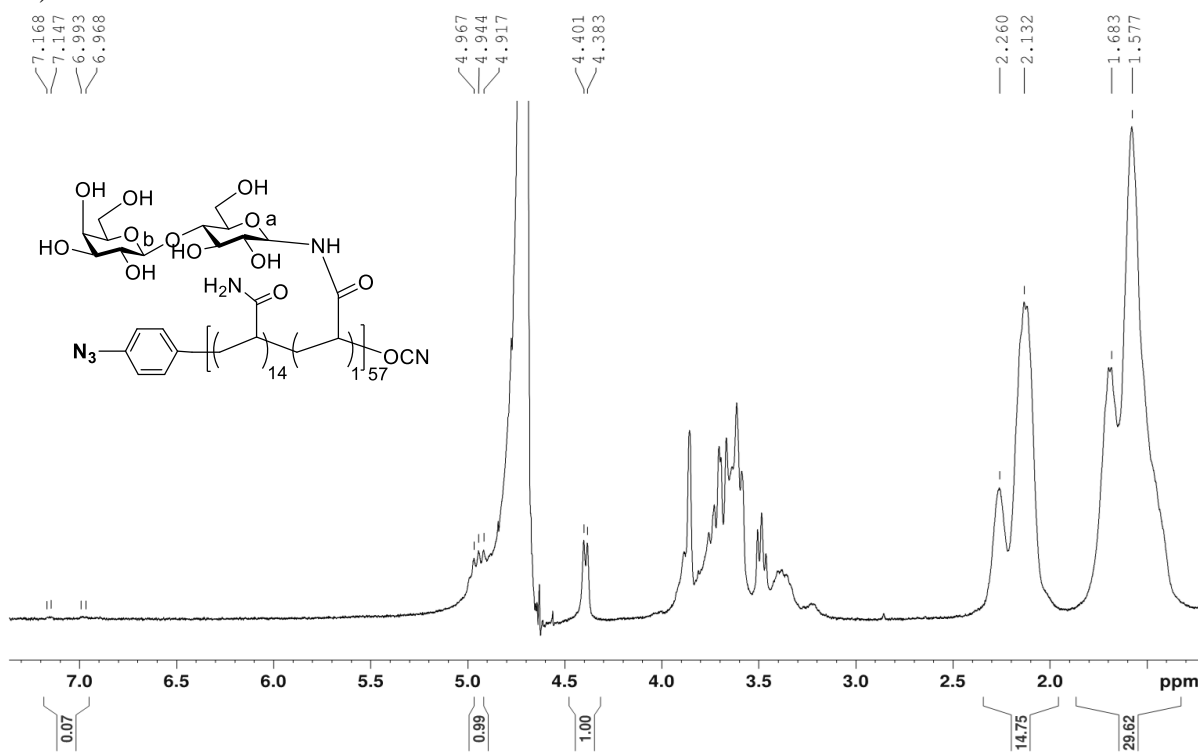

**Fig. S5.** <sup>1</sup>H NMR spectrum of azide chain-end functionalized *N*-lactose polymer (400 MHz, D<sub>2</sub>O).

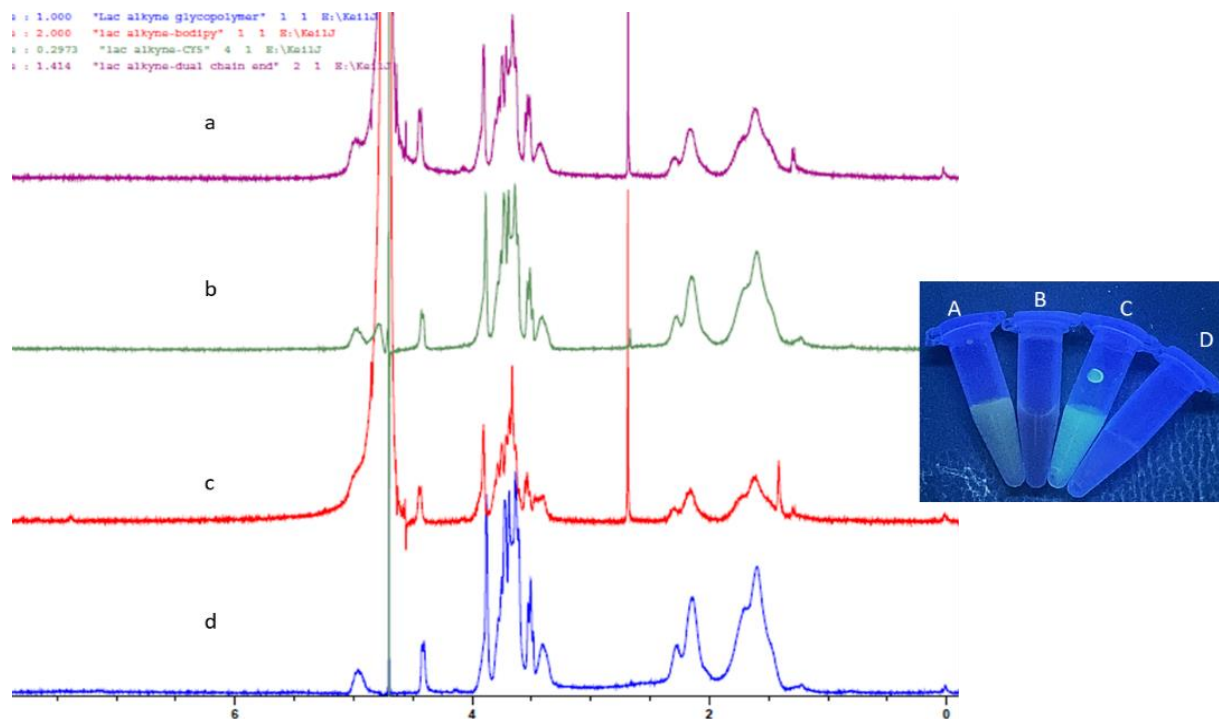

**Fig. S6.** <sup>1</sup>H NMR Spectra and Pictures under UV lamp of Functionalized Alkyne-Lactose Polymer; a) Bodipy-Lactose Polymer-Cy5 b) Alkyne-Lactose Polymer-Cy5 c) Bodipy-Lactose Polymer d) Alkyne-Lactose Polymer in D<sub>2</sub>O.

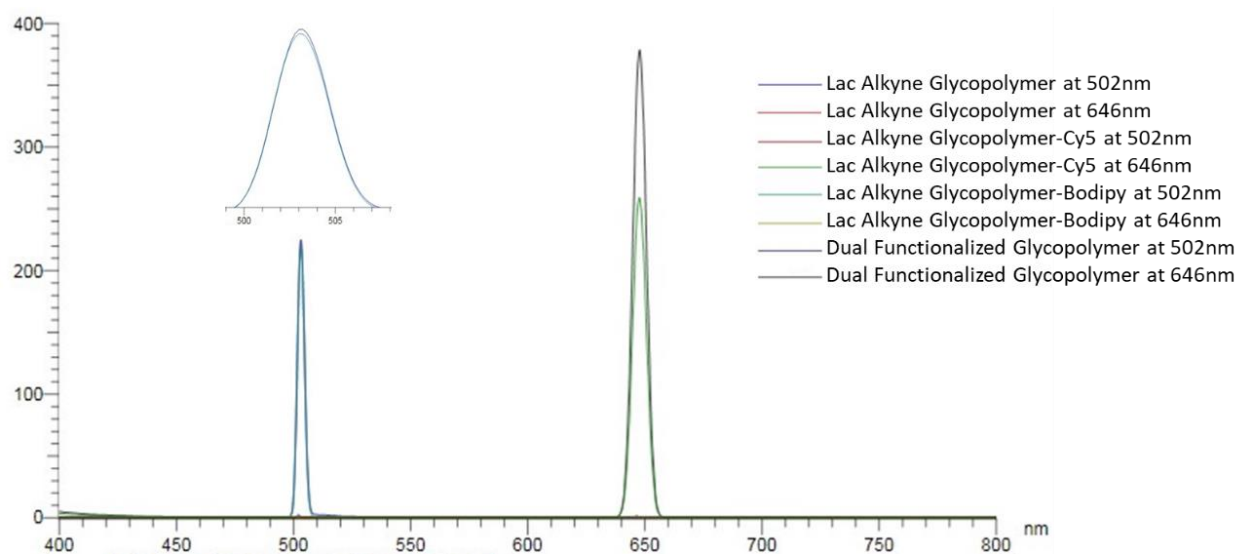

**Fig. S7.** Fluorescent spectra of Functionalized Alkyne-Lactose Polymer in H<sub>2</sub>O.

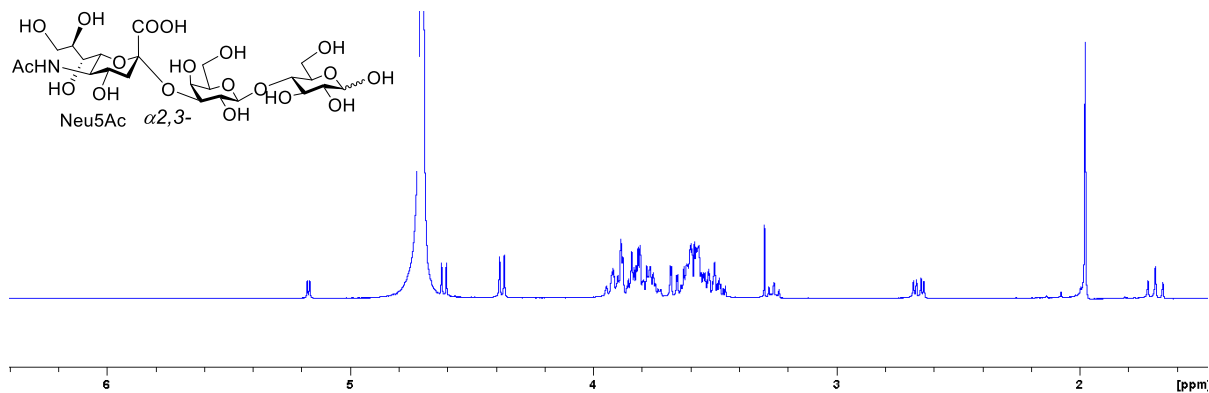

**Fig. S8.**  $^1\text{H}$  NMR spectrum of  $\alpha$ 2,6-sialolactose (400 MHz,  $\text{D}_2\text{O}$ ).

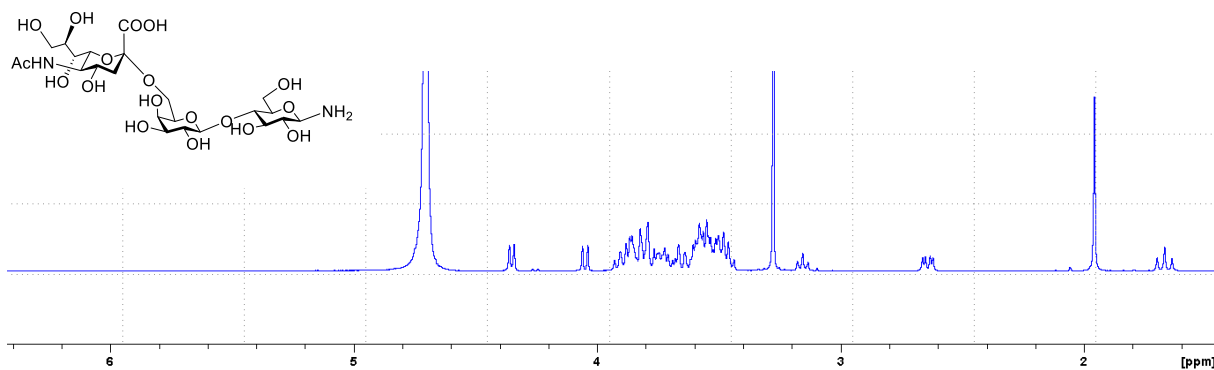

**Fig. S9.**  $^1\text{H}$  NMR spectrum of  $\alpha$ 2,6-sialolactosylamine (400 MHz,  $\text{D}_2\text{O}$ ).

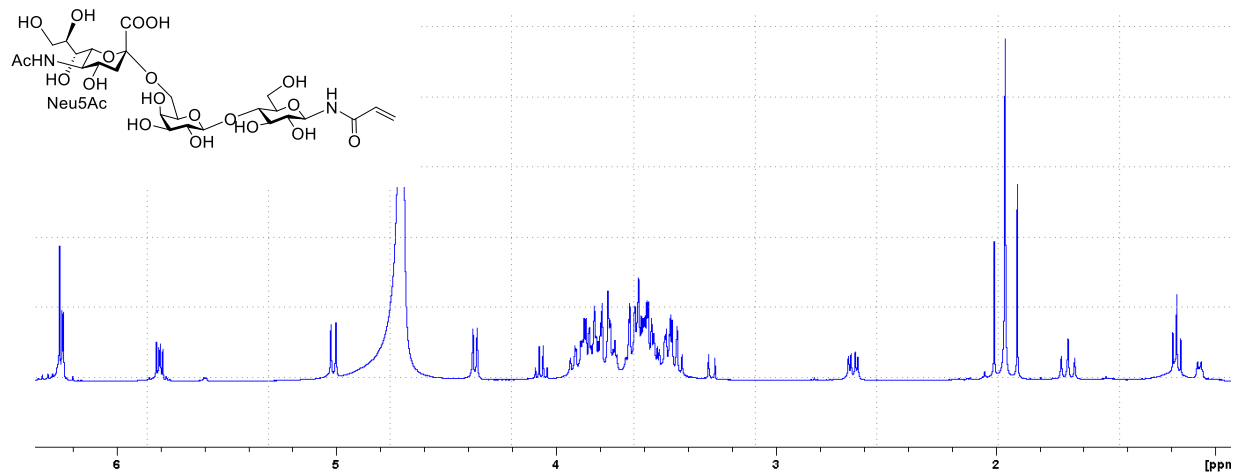

**Fig. S10.**  $^1\text{H}$  NMR spectrum of *N*-(prop-2-enyl)- $\alpha$ 2,6-siallyllactamine (400 MHz,  $\text{D}_2\text{O}$ ).

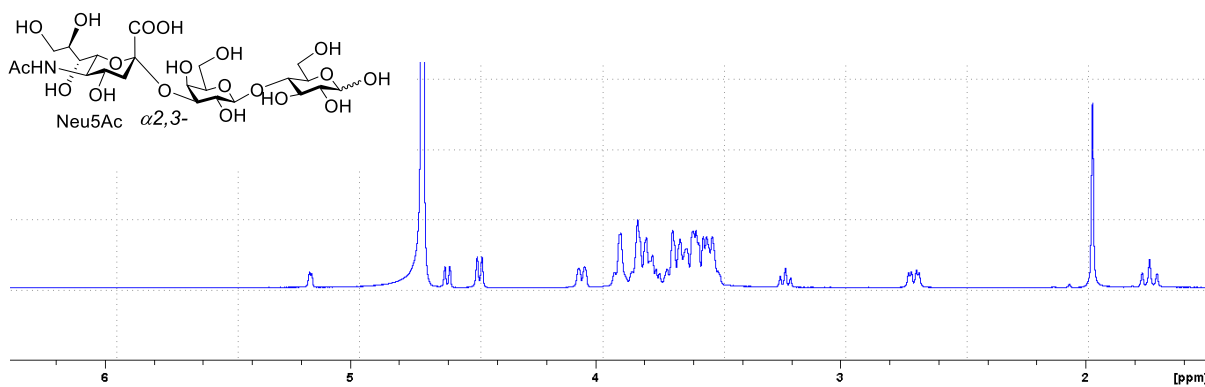

**Fig. S11.**  $^1\text{H}$  NMR spectrum of  $\alpha$ 2,3-sialolactose (400 MHz,  $\text{D}_2\text{O}$ ).

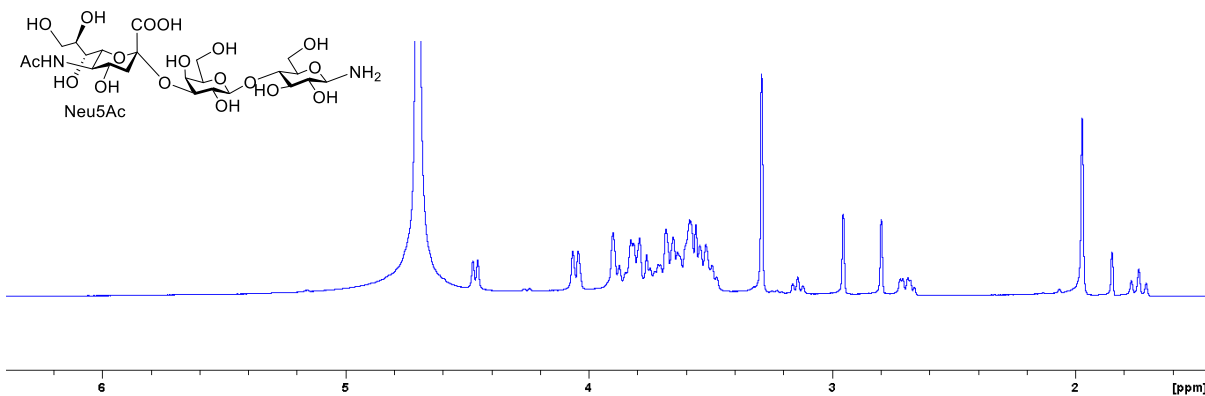

**Fig. S12.**  $^1\text{H}$  NMR spectrum of  $\alpha$ 2,3-sialolactosylamine (400 MHz,  $\text{D}_2\text{O}$ ).

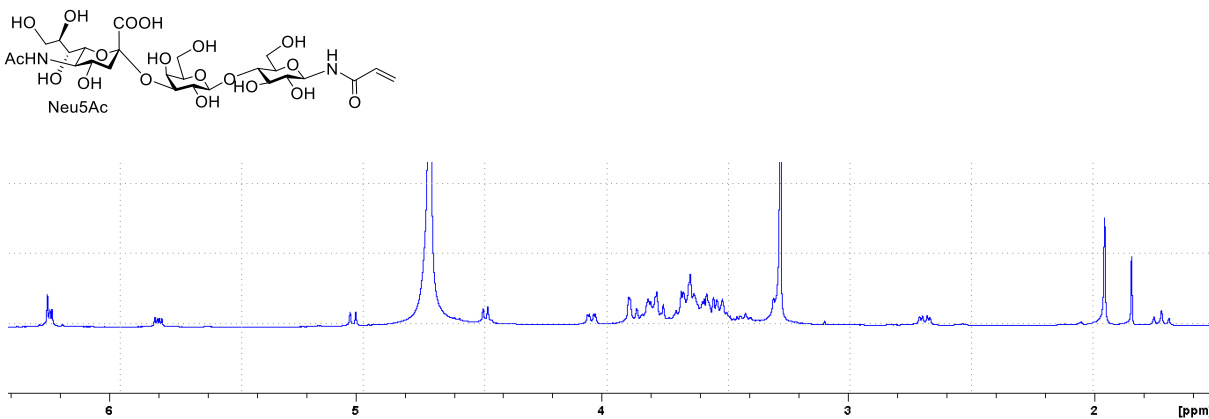

**Fig. S13.**  $^1\text{H}$  NMR spectrum of *N*-(prop-2-enoyl)- $\alpha$ 2,3-sialyllactamine (400 MHz,  $\text{D}_2\text{O}$ ).

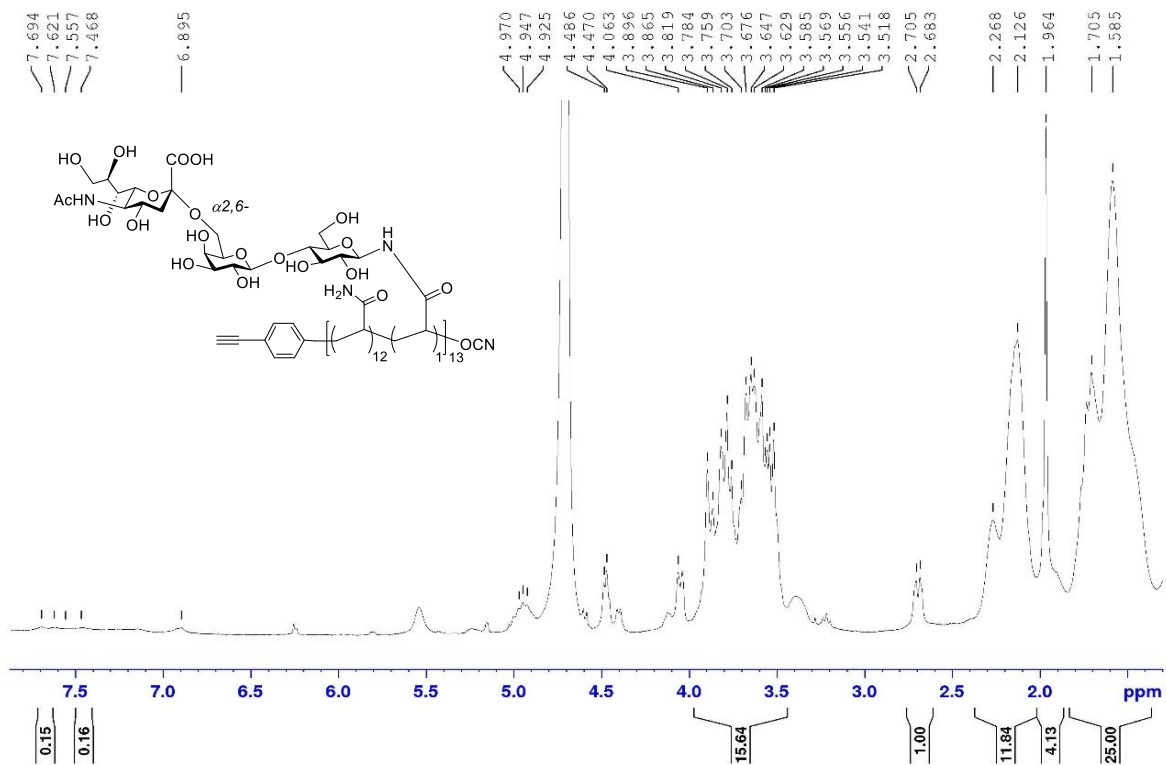

**Fig. S14.**  $^1\text{H}$  NMR spectrum of alkyne chain-end functionalized  $N$ - $\alpha$ 2,6-sialyllactose polymer (400 MHz,  $\text{D}_2\text{O}$ ).

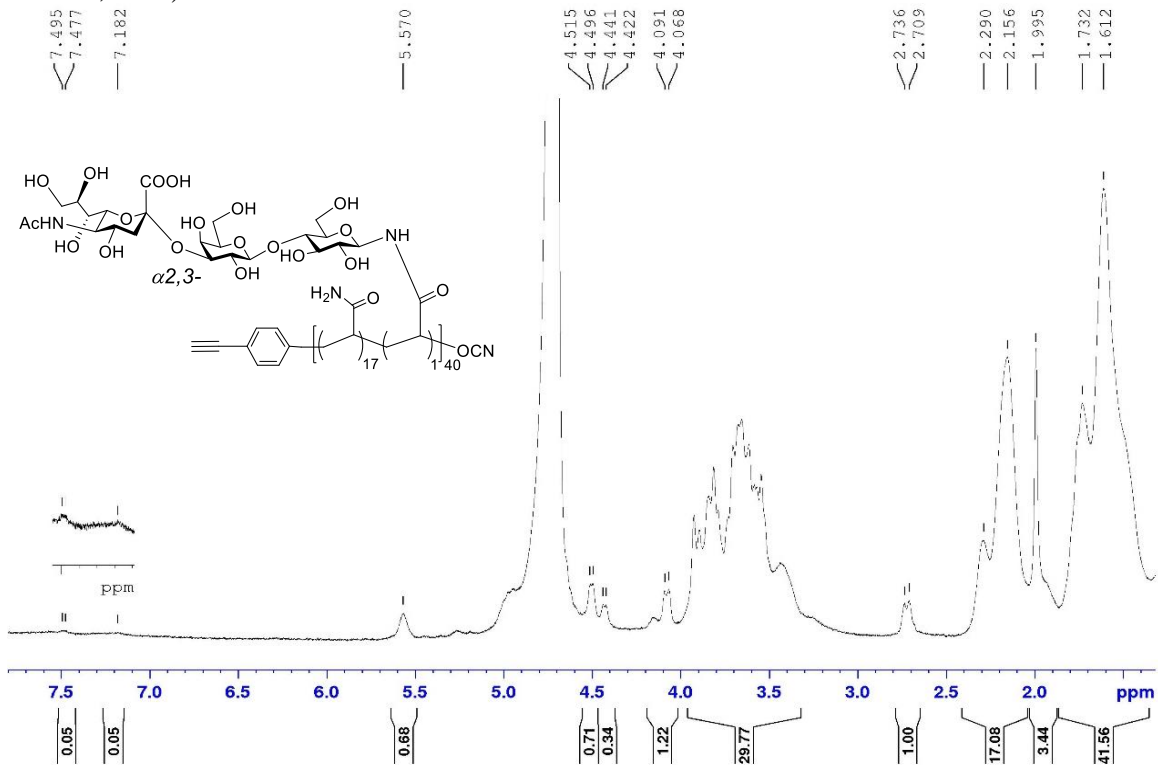

**Fig. S15.**  $^1\text{H}$  NMR spectrum of alkyne chain-end functionalized  $N$ - $\alpha$ 2,3-sialyllactose polymer (400 MHz,  $\text{D}_2\text{O}$ ).

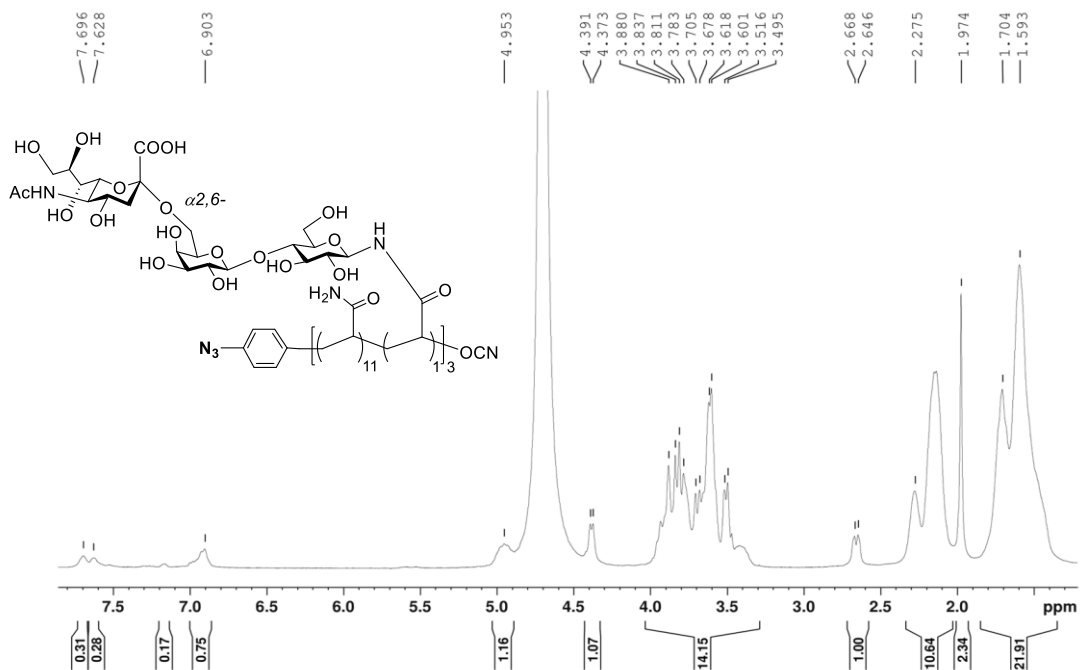

**Fig. S16.**  $^1\text{H}$  NMR spectrum of azide chain-end functionalized  $N$ - $\alpha$ 2,6-sialyllactose polymer (400 MHz,  $\text{D}_2\text{O}$ ).

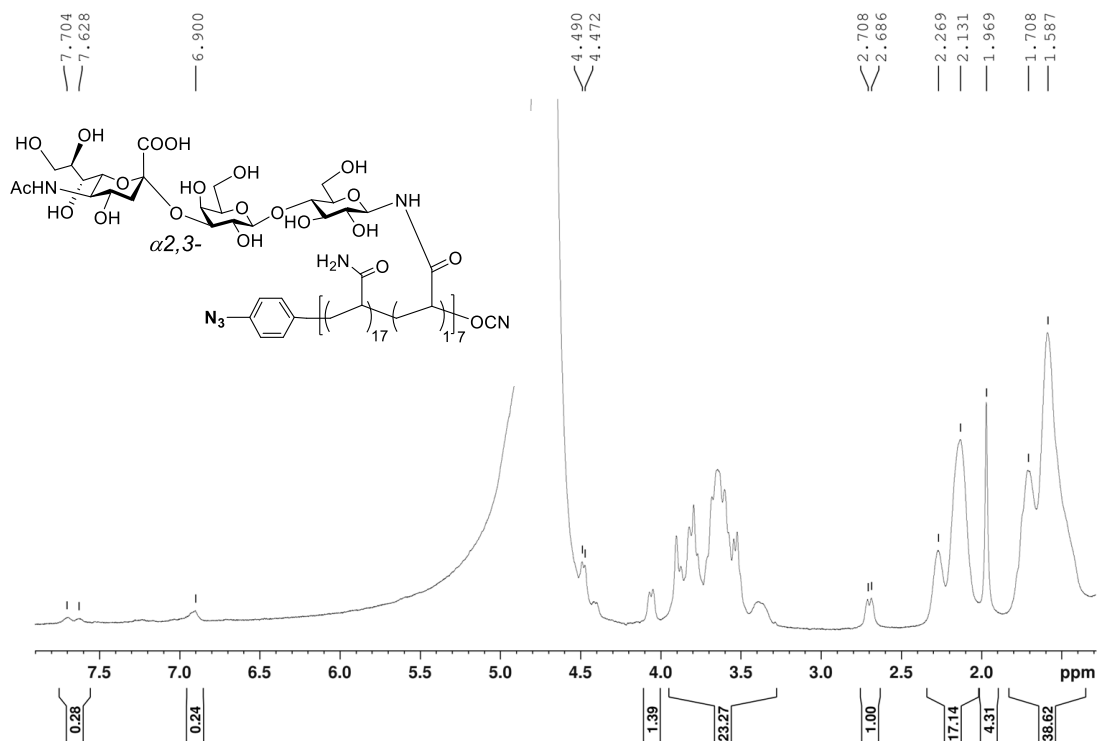

**Fig. S17.**  $^1\text{H}$  NMR spectrum of azide chain-end functionalized  $N$ - $\alpha$ 2,3-sialyllactose polymer (400 MHz,  $\text{D}_2\text{O}$ ).
